# Supplementary material
Source: publisher site journal article supplement (https://www.dovepress.com/get_supplementary_file.php?f=supplementary_file_63435.pdf)
Supplement: Supplementary file 1 [file get_supplementary_file.php]

## Appendix: Simulator list

| number | company                              | simulator name                                        | category | Validity level (reference)        |
|--------|--------------------------------------|-------------------------------------------------------|----------|-----------------------------------|
| 1      | METI                                 | MetiMan                                               | 1        |                                   |
| 2      | METI                                 | iStan                                                 | 1        |                                   |
| 3      | CAE                                  | HPS                                                   | 1        | content [36-39]                   |
| 4      | CAE                                  | ECS                                                   | 1        | content [48; 49]                  |
| 5      | surgical science                     | PediaSim                                              | 1        |                                   |
| 6      | METI                                 | BabySim                                               | 1        |                                   |
| 7      | METI                                 | Pelvic Exam sim                                       | 1        |                                   |
| 8      | kyoto kagaku co.ltd                  | Cardiology Patient Simulator "K PLUS" Training system | 1        |                                   |
| 9      | kyoto kagaku co.ltd                  | LSAT Lung Sound Auscultation Trainer                  | 1        |                                   |
| 10     | kyoto kagaku co.ltd                  | EYE                                                   | 1        |                                   |
| 11     | kyoto kagaku co.ltd                  | EAR                                                   | 1        |                                   |
| 12     | kyoto kagaku co.ltd                  | Visual-Tactile Breast Examination Simulator           | 1        |                                   |
| 13     | kyoto kagaku co.ltd                  | Newborn Vital Signs Examination Simulator II          | 1        |                                   |
| 14     | kyoto kagaku co.ltd                  | Prostate Examination Simulator                        | 1        |                                   |
| 15     | kyoto kagaku co.ltd                  | Digital Rectal Examination Simulator                  | 1        |                                   |
| 16     | kyoto kagaku co.ltd                  | Pitting Edema Model                                   | 1        |                                   |
| 17     | kyoto kagaku co.ltd                  | Pelvic Mentor                                         | 1        |                                   |
| 18     | laerdal                              | SimMan                                                | 1        | concurrent [28;50; 64;155]        |
| 19     | kyoto kagaku co.ltd                  | Sim Junior                                            | 1        |                                   |
| 20     | kyoto kagaku co.ltd                  | ALS Simulator                                         | 1        |                                   |
| 21     | laerdal                              | SimBaby                                               | 1        | concurrent [29]                   |
| 22     | CAE                                  | SimNewB                                               | 1        | content [52]                      |
| 23     | laerdal                              | Harvey ,The Cardiopulmonary Patient Simulator         | 1        | concurrent; [51; 65; 66; 67; 154] |
| 24     | CAE                                  | Nursing Anne                                          | 1        | face [48]                         |
| 25     | kyoto kagaku co.ltd                  | Nursing Kelly                                         | 1        |                                   |
| 26     | kyoto kagaku co.ltd                  | Nursing Kid                                           | 1        |                                   |
| 27     | kyoto kagaku co.ltd                  | Nursing Baby                                          | 1        |                                   |
| 28     | kyoto kagaku co.ltd                  | Newborn Anne                                          | 1        |                                   |
| 29     | kyoto kagaku co.ltd                  | Baby Hippy                                            | 1        |                                   |
| 30     | Shanghai Honglian Medical Instrument | Breast Inspection Model(medical model)                | 1        |                                   |

|    |                                                            |                                                           |   |           |
|----|------------------------------------------------------------|-----------------------------------------------------------|---|-----------|
|    | Development Co., Ltd.                                      |                                                           |   |           |
| 31 | Shanghai Honglian Medical Instrument Development Co., Ltd. | Gynaecological Training Model(Gynaecology, medical model) | 1 |           |
| 32 | Shanghai Honglian Medical Instrument Development Co., Ltd. | Advanced Maternity Model(medical model,model)             | 1 |           |
| 33 | Shanghai Honglian Medical Instrument Development Co., Ltd. | Labor Delivery Module(medical model)                      | 1 |           |
| 34 | Limbs & things                                             | Lung Sound Auscultation Trainer                           | 1 |           |
| 35 | Limbs & things                                             | Cardiology Patient Simulator "K Plus" training system     | 1 |           |
| 36 | Limbs & things                                             | Ear Examination Simulator                                 | 1 |           |
| 37 | Limbs & things                                             | Eye Examination Simulator                                 | 1 |           |
| 38 | CAE                                                        | Lecat's VentriloScope: Standard Package                   | 1 | Face [46] |
| 39 | Limbs & things                                             | Clinical Female Pelvic Trainer Mk 3 - Advanced            | 1 |           |
| 40 | Limbs & things                                             | Examination & Diagnostic Breast Trainer                   | 1 |           |
| 41 | Limbs & things                                             | Strap-on Breasts                                          | 1 |           |
| 42 | Limbs & things                                             | Rectal Examination Trainer Mk 2                           | 1 |           |
| 43 | Limbs & things                                             | Urethral Sling Procedure Trainer                          | 1 |           |
| 44 | Limbs & things                                             | Bristol TURP Trainer                                      | 1 |           |
| 45 | Adam Rouilly                                               | ADULT CRISIS AUSCULTATION MANIKIN                         | 1 |           |
| 46 | Adam Rouilly                                               | DELUXE PLUS ADULT CRISIS AUSCULTATION MANIKIN             | 1 |           |
| 47 | Adam Rouilly                                               | DIAGNOSTIC PERITONEAL LAVAGE TRAINER                      | 1 |           |
| 48 | Adam Rouilly                                               | INTERACTIVE ECG SIMULATOR                                 | 1 |           |
| 49 | Adam Rouilly                                               | AUSCULTATION TRAINER AND SMARTSCOPE™                      | 1 |           |
| 50 | Adam Rouilly                                               | ANTERIOR AUSCULTATION PRACTICE BOARD AND CASE             | 1 |           |
| 51 | Adam Rouilly                                               | GERI™ AUSCULTATION TORSO                                  | 1 |           |
| 52 | Adam Rouilly                                               | KERI™ AUSCULTATION TORSO                                  | 1 |           |
| 53 | Adam Rouilly                                               | CHILD HEART AND LUNG SOUNDS TRAINER                       | 1 |           |

|    |              |                                                               |   |  |
|----|--------------|---------------------------------------------------------------|---|--|
| 54 | Adam Rouilly | BLOOD PRESSURE SIMULATOR FOR CPARLENE™                        | 1 |  |
| 55 | Adam Rouilly | BLOOD PRESSURE SIMULATOR                                      | 1 |  |
| 56 | Adam Rouilly | DELUXE BLOOD PRESSURE SIMULATOR WITH AMPLIFIER/SPEAKER SYSTEM | 1 |  |
| 57 | Adam Rouilly | STANDARD BREAST SELF EXAMINATION TRAINER                      | 1 |  |
| 58 | Adam Rouilly | FIBROCYSTIC BSE MODEL                                         | 1 |  |
| 59 | Adam Rouilly | DIFFERENT SIZE BSE MODELS                                     | 1 |  |
| 60 | Adam Rouilly | AXILLARY LYMPH NODE MODEL                                     | 1 |  |
| 61 | Adam Rouilly | BREAST SELF-EXAMINATION TRAINING MODEL                        | 1 |  |
| 62 | Adam Rouilly | BREAST CANCER TRAINING MODEL                                  | 1 |  |
| 63 | Adam Rouilly | EXAMINATION AND DIAGNOSTIC BREAST TRAINER                     | 1 |  |
| 64 | Adam Rouilly | STRAP-ON BREASTS                                              | 1 |  |
| 65 | Adam Rouilly | BREAST MODEL WITH TRANSLUCENT BASE                            | 1 |  |
| 66 | Adam Rouilly | CERVICAL DILATATION/EFFACEMENT SIMULATORS                     | 1 |  |
| 67 | Adam Rouilly | EAR DIAGNOSTIC TRAINER                                        | 1 |  |
| 68 | Adam Rouilly | MALE BREAST CANCER AWARENESS MODEL                            | 1 |  |
| 69 | Adam Rouilly | EYE RETINOPATHY TRAINER                                       | 1 |  |
| 70 | Adam Rouilly | GYNAECOLOGY TRAINING MODEL                                    | 1 |  |
| 71 | Adam Rouilly | CLINICAL FEMALE PELVIC TRAINER MK 3                           | 1 |  |
| 72 | Adam Rouilly | GYN - TRAINER                                                 | 1 |  |
| 73 | Adam Rouilly | EVA GYNAECOLOGICAL MANIKIN                                    | 1 |  |
| 74 | Adam Rouilly | BRADFORD PELVIC FLOOR ASSESSMENT MODEL                        | 1 |  |
| 75 | Adam Rouilly | CLINICAL MALE PELVIC TRAINER                                  | 1 |  |
| 76 | Adam Rouilly | RECTAL EXAMINATION MODE                                       | 1 |  |
| 77 | Adam Rouilly | UROLOGICAL PRACTICE TRAINER                                   | 1 |  |

|     |                     |                                            |   |                     |
|-----|---------------------|--------------------------------------------|---|---------------------|
| 78  | Adam Rouilly        | RECTAL EXAMINATION TRAINER                 | 1 |                     |
| 79  | Adam Rouilly        | PROSTATE EXAMINATION SIMULATOR             | 1 |                     |
| 80  | Adam Rouilly        | DIAGNOSTIC FACE WITH LESIONS               | 1 |                     |
| 81  | Adam Rouilly        | TESTICLE SELF EXAMINATION TRAINER          | 1 |                     |
| 82  | 3B Scientific       | Enema Administration Simulator             | 1 |                     |
| 83  | cardionics          | The Arterial Pulse Training System         | 1 |                     |
| 84  | koken               | Virtual reality vaginal exam model         | 1 |                     |
| 85  | koken               | physical assessment trainer                | 1 |                     |
| 86  | KYOTO KAGAKU CO.LTD | CVC Insertion Simulator II                 | 2 |                     |
| 87  | KYOTO KAGAKU CO.LTD | Arterial Puncture Wrist                    | 2 |                     |
| 88  | KYOTO KAGAKU CO.LTD | Lumbar Puncture Simulator II               | 2 |                     |
| 89  | KYOTO KAGAKU CO.LTD | Simulator Intravenous Arm IIa              | 2 |                     |
| 90  | KYOTO KAGAKU CO.LTD | Strap-on Venipuncture Trainer              | 2 |                     |
| 91  | KYOTO KAGAKU CO.LTD | Intradermal Injection Training Simulator   | 2 |                     |
| 92  | Laerdal             | Newborn Nita                               | 2 |                     |
| 93  | Laerdal             | Virtual I.V.                               | 2 | concurrent [1; 153] |
| 94  | Laerdal             | Virtual Phlebotomy                         | 2 |                     |
| 95  | Laerdal             | Vascular Access - Chester Chest™           | 2 |                     |
| 96  | Laerdal             | Vascular Access - Peter PICC Line™         | 2 |                     |
| 97  | Laerdal             | Femoral Access Trainer                     | 2 |                     |
| 98  | Laerdal             | Multi-Venous IV Training Arms              | 2 |                     |
| 99  | Laerdal             | Pediatric Multi-Venous IV Training Arm Kit | 2 |                     |
| 100 | Laerdal             | Arterial Arm Stick Kit                     | 2 |                     |
| 101 | Laerdal             | IM Hip Task Trainer                        | 2 |                     |
| 102 | Laerdal             | Laerdal® IV Torso                          | 2 |                     |
| 103 | Laerdal             | Infant IV Leg                              | 2 |                     |
| 104 | Laerdal             | Standard IV Hand Trainer                   | 2 |                     |
| 105 | Laerdal             | Deluxe IV Elbow                            | 2 |                     |
| 106 | Laerdal             | Infant IO Leg                              | 2 |                     |
| 107 | Laerdal             | Baby Ivy                                   | 2 |                     |
| 108 | Laerdal             | Baby Stap                                  | 2 |                     |

|     |                                                            |                                                                                               |   |                     |
|-----|------------------------------------------------------------|-----------------------------------------------------------------------------------------------|---|---------------------|
| 109 | Laerdal                                                    | Baby Arti                                                                                     | 2 |                     |
| 110 | simulab                                                    | CentraLineMan System                                                                          | 2 | concurrent<br>[151] |
| 111 | simulab                                                    | FemoraLineMan System                                                                          | 2 |                     |
| 112 | simulab                                                    | Arthrocentesis Model                                                                          | 2 |                     |
| 113 | Shanghai Honglian Medical Instrument Development Co., Ltd. | Advanced Intramuscular Injection Training Model(medical manikin)                              | 2 |                     |
| 114 | Shanghai Honglian Medical Instrument Development Co., Ltd. | Child IV Training Arm(nursing model)                                                          | 2 |                     |
| 115 | Shanghai Honglian Medical Instrument Development Co., Ltd. | Buttocks Intramuscular Injection Simulator(nursing model,medical model)                       | 2 |                     |
| 116 | Shanghai Honglian Medical Instrument Development Co., Ltd. | Infant Cephalic Venipuncture Model(medical model,nursing model)                               | 2 |                     |
| 117 | Shanghai Honglian Medical Instrument Development Co., Ltd. | Advanced Pediatric Head(nursing model,medical model)                                          | 2 |                     |
| 118 | Shanghai Honglian Medical Instrument Development Co., Ltd. | Multi-functional IV Training Arm(nursing model)                                               | 2 |                     |
| 119 | Shanghai Honglian Medical Instrument Development Co., Ltd. | Hand and Elbow Combined Intravenous Transfusion Training Model(medical model,nursing model)   | 2 |                     |
| 120 | Shanghai Honglian Medical Instrument Development Co., Ltd. | Intramuscular Injection Training Pad(nursing model,medical model)                             | 2 |                     |
| 121 | Shanghai Honglian Medical Instrument Development Co., Ltd. | IV Training Hand(nursing model)                                                               | 2 |                     |
| 122 | Shanghai Honglian Medical Instrument Development Co., Ltd. | Upper-arm Intramuscular Injection Simulator with Alarming System(nursing model,medical model) | 2 |                     |
| 123 | Shanghai Honglian Medical Instrument Development Co., Ltd. | Intramuscular Injection Training Pad Model                                                    | 2 |                     |
| 124 | Limbs & things                                             | Advanced Venipuncture Arm                                                                     | 2 |                     |
| 125 | Limbs & things                                             | Simulator Intravenous Arm II                                                                  | 2 |                     |
| 126 | Limbs & things                                             | ACF Pad - Venipuncture                                                                        | 2 |                     |
| 127 | Limbs & things                                             | Extended ACF Pad - Venipuncture                                                               | 2 |                     |
| 128 | Limbs & things                                             | Cutdown Pad                                                                                   | 2 |                     |
| 129 | Limbs & things                                             | Arterial Puncture Wrist                                                                       | 2 |                     |
| 130 | Limbs & things                                             | Chester Chest™                                                                                | 2 |                     |

|     |                |                                                             |   |                     |
|-----|----------------|-------------------------------------------------------------|---|---------------------|
| 131 | Limbs & things | TPN/IVH Care Simulator                                      | 2 |                     |
| 132 | Limbs & things | Ultrasound Central Venous Catheter Insertion Simulator Mk 2 | 2 |                     |
| 133 | Limbs & things | IV Torso                                                    | 2 |                     |
| 134 | Limbs & things | Femoral Access Trainer                                      | 2 |                     |
| 135 | simulab        | Lumbar Puncture & Epidural Simulator Mk 2                   | 2 | concurrent [40; 41] |
| 136 | Limbs & things | Ultrasound Vascular Access Trainer                          | 2 |                     |
| 137 | Limbs & things | Injection Trainer                                           | 2 |                     |
| 138 | Limbs & things | Hand & Wrist for Joint Injection                            | 2 |                     |
| 139 | Limbs & things | Knee for Aspiration Mk 2                                    | 2 |                     |
| 140 | Limbs & things | Elbow for Joint Injection                                   | 2 |                     |
| 141 | Limbs & things | Shoulder for Joint Injection                                | 2 |                     |
| 142 | Limbs & things | Foot & Ankle for Joint Injection                            | 2 |                     |
| 143 | Limbs & things | Intraosseous Trainer                                        | 2 |                     |
| 144 | Limbs & things | Huddersfield Foot & Ankle for Nerve Block                   | 2 |                     |
| 145 | Limbs & things | Percutaneous Nephrolithotomy Trainer                        | 2 |                     |
| 146 | Adam Rouilly   | Cricothyrotomy simulator with four overlay skins            | 2 |                     |
| 147 | Adam Rouilly   | Cutdown Pad                                                 | 2 |                     |
| 148 | Adam Rouilly   | Child intraosseous infusion/femoral acces leg               | 2 |                     |
| 149 | Adam Rouilly   | Tension pneumothorax model                                  | 2 |                     |
| 150 | Adam Rouilly   | Arterial puncture arm simulator                             | 2 |                     |
| 151 | Adam Rouilly   | Injection training arm for CPARLENE™                        | 2 |                     |
| 152 | Adam Rouilly   | VENEPUNCTURE, CANNULATION & INFUSION ARM                    | 2 |                     |
| 153 | Adam Rouilly   | ADVANCED INJECTION ARM                                      | 2 |                     |
| 154 | Adam Rouilly   | INJECTABLE TRAINING ARM                                     | 2 |                     |
| 155 | Adam Rouilly   | INJECTION ARM                                               | 2 |                     |
| 156 | Adam Rouilly   | IV DEMONSTRATION ARM                                        | 2 |                     |
| 157 | Adam Rouilly   | ADVANCED IV HAND                                            | 2 |                     |
| 158 | Adam Rouilly   | VENATECH IV TRAINER                                         | 2 |                     |
| 159 | Adam Rouilly   | TWO/FOUR VEIN VENEPUNCTURE TRAINING AID                     | 2 |                     |
| 160 | Adam Rouilly   | ADVANCED VENEPUNCTURE                                       | 2 |                     |

|     |              |                                                                 |   |  |
|-----|--------------|-----------------------------------------------------------------|---|--|
|     |              | TRAINING AID                                                    |   |  |
| 161 | Adam Rouilly | ACF PAD -<br>VENEPUNCTURE                                       | 2 |  |
| 162 | Adam Rouilly | THREE VEIN PAD -<br>VENEPUNCTURE                                | 2 |  |
| 163 | Adam Rouilly | EXTENDED ACF PAD -<br>VENEPUNCTURE                              | 2 |  |
| 164 | Adam Rouilly | INTRADERMAL INJECTION<br>SIMULATOR                              | 2 |  |
| 165 | Adam Rouilly | INJECTION TRAINER                                               | 2 |  |
| 166 | Adam Rouilly | PAEDIATRIC INJECTION<br>ARM SIMULATOR                           | 2 |  |
| 167 | Adam Rouilly | IV LEG                                                          | 2 |  |
| 168 | Adam Rouilly | IV ARM                                                          | 2 |  |
| 169 | Adam Rouilly | GERIATRIC IV TRAINING<br>ARM                                    | 2 |  |
| 170 | Adam Rouilly | CHESTER CHEST MODEL<br>WITH ADVANCED ARM                        | 2 |  |
| 171 | Adam Rouilly | CHESTER CHEST MODEL<br>WITH ADVANCED ARM<br>AND PERIPHERAL PORT | 2 |  |
| 172 | Adam Rouilly | CENTRAL VENOUS<br>PUNCTURE TRAINER                              | 2 |  |
| 173 | Adam Rouilly | CENTRAL VENOUS<br>CANNULATION<br>SIMULATOR                      | 2 |  |
| 174 | Adam Rouilly | ARIN APRON MODEL<br>WITH CASE                                   | 2 |  |
| 175 | Adam Rouilly | PORT - BODY IN A BOX                                            | 2 |  |
| 176 | Adam Rouilly | PAIN RELIEF MANIKIN                                             | 2 |  |
| 177 | Adam Rouilly | SPINAL INJECTION<br>SIMULATOR                                   | 2 |  |
| 178 | Adam Rouilly | LUMBAR EPIDURAL<br>INJECTION TRAINER                            | 2 |  |
| 179 | Adam Rouilly | HAEMODIALYSIS<br>PRACTICE ARM                                   | 2 |  |
| 180 | Adam Rouilly | DORSOGLUTEAL<br>INTRAMUSCULAR<br>INJECTION MODEL                | 2 |  |
| 181 | Adam Rouilly | VENTROGLUTEAL<br>INTRAMUSCULAR<br>INJECTION MODEL               | 2 |  |
| 182 | Adam Rouilly | INTRAMUSCULAR<br>INJECTION SIMULATOR                            | 2 |  |
| 183 | Adam Rouilly | SHOULDER FOR JOINT<br>INJECTION                                 | 2 |  |
| 184 | Adam Rouilly | ELBOW FOR JOINT<br>INJECTION                                    | 2 |  |
| 185 | Adam Rouilly | HAND AND WRIST FOR<br>JOINT INJECTION                           | 2 |  |
| 186 | Adam Rouilly | FOOT AND ANKLE FOR<br>JOINT INJECTION                           | 2 |  |

|     |                                                            |                                                                                     |   |  |
|-----|------------------------------------------------------------|-------------------------------------------------------------------------------------|---|--|
| 187 | Adam Rouilly                                               | KNEE FOR ASPIRATION MK 2                                                            | 2 |  |
| 188 | Adam Rouilly                                               | FOOT AND ANKLE FOR NERVE BLOCK                                                      | 2 |  |
| 189 | Adam Rouilly                                               | NITA NEWBORN                                                                        | 2 |  |
| 190 | Adam Rouilly                                               | PAEDIATRIC INJECTION HEAD SIMULATOR                                                 | 2 |  |
| 191 | Adam Rouilly                                               | PETER PICC LINE MODEL WITH CASE                                                     | 2 |  |
| 192 | nasco                                                      | LP simulator                                                                        | 2 |  |
| 193 | simulaids                                                  | Geriatric IV Arm                                                                    | 2 |  |
| 194 | koken                                                      | Gluteal intramuscular injection model                                               | 2 |  |
| 195 | koken                                                      | multipurpose injection training arm                                                 | 2 |  |
| 196 | koken                                                      | Injection and blood sampling practice model                                         | 2 |  |
| 197 | ambu                                                       | Ambu® I.V. Trainer                                                                  | 2 |  |
| 198 | Laerdal                                                    | Neonatal Resuscitation Baby                                                         | 3 |  |
| 199 | Laerdal                                                    | First Aid Training Manikin                                                          | 3 |  |
| 200 | Laerdal                                                    | Crash Kelly                                                                         | 3 |  |
| 201 | Laerdal                                                    | Ultimate Hurt                                                                       | 3 |  |
| 202 | Laerdal                                                    | Pneumothorax Trainer                                                                | 3 |  |
| 203 | Laerdal                                                    | AT Kelly Torso                                                                      | 3 |  |
| 204 | Laerdal                                                    | 12-Lead Task Trainer                                                                | 3 |  |
| 205 | Laerdal                                                    | Cricoid Stick Trainer                                                               | 3 |  |
| 206 | Laerdal                                                    | Choking Charlie                                                                     | 3 |  |
| 207 | Laerdal                                                    | Mr. Hurt Head Trauma Trainer                                                        | 3 |  |
| 208 | Shanghai Honglian Medical Instrument Development Co., Ltd. | Advanced Nursing Manikin(cpr medical manikin ,educational equipment)                | 3 |  |
| 209 | Shanghai Honglian Medical Instrument Development Co., Ltd. | Adult Tracheotomy Care Model(medical model)                                         | 3 |  |
| 210 | Shanghai Honglian Medical Instrument Development Co., Ltd. | Advanced Full Functional Five-year-old Child Nursing and CPR Manikin(medical model) | 3 |  |
| 211 | Shanghai Honglian Medical Instrument Development Co., Ltd. | Advanced CPR,AED and Trauma Care Training Manikin(medical model)                    | 3 |  |
| 212 | Shanghai Honglian Medical Instrument Development Co., Ltd. | Advanced, Comprehensive emergency skills training system(medical model,cpr human)   | 3 |  |
| 213 | Shanghai Honglian Medical Instrument Development Co., Ltd. | Multi-functional Airway Management Model(medical model)                             | 3 |  |



|     |                                                            |                                                                  |   |  |
|-----|------------------------------------------------------------|------------------------------------------------------------------|---|--|
| 214 | Shanghai Honglian Medical Instrument Development Co., Ltd. | Advanced CPR,AED and Trauma Care Training Manikin(medical model) | 3 |  |
| 215 | Shanghai Honglian Medical Instrument Development Co., Ltd. | Half-length CPR Training Manikin(medical model)                  | 3 |  |
| 216 | Shanghai Honglian Medical Instrument Development Co., Ltd. | Advanced CPR Training Manikin(medical model)                     | 3 |  |
| 217 | Shanghai Honglian Medical Instrument Development Co., Ltd. | Comprehensive Emergency Skills Training Manikin(medical model)   | 3 |  |
| 218 | Shanghai Honglian Medical Instrument Development Co., Ltd. | Tracheostomy Simulator(medical model)                            | 3 |  |
| 219 | Shanghai Honglian Medical Instrument Development Co., Ltd. | Infant Tracheal Intubation Model(airway model)                   | 3 |  |
| 220 | Shanghai Honglian Medical Instrument Development Co., Ltd. | ACLS Training Manikin(medical model)                             | 3 |  |
| 221 | Limbs & things                                             | Truman Multi                                                     | 3 |  |
| 222 | Limbs & things                                             | Airway Suction Trainer 'Q'                                       | 3 |  |
| 223 | Limbs & things                                             | Cricoid Stick Simulator                                          | 3 |  |
| 224 | Limbs & things                                             | Pneumothorax Trainer                                             | 3 |  |
| 225 | Limbs & things                                             | AirSimMulti                                                      | 3 |  |
| 226 | Limbs & things                                             | AirSim Bronchi                                                   | 3 |  |
| 227 | Limbs & things                                             | AirSim Advance Crico                                             | 3 |  |
| 228 | Limbs & things                                             | AirSim Junior                                                    | 3 |  |
| 229 | Limbs & things                                             | ADVANCED AIRWAY LARRY ADULT TRAINER HEAD                         | 3 |  |
| 230 | Limbs & things                                             | CRITICAL AIRWAY MANAGEMENT TRAINER                               | 3 |  |
| 231 | Limbs & things                                             | CHILD AIRWAY MANAGEMENT TRAINER                                  | 3 |  |
| 232 | Limbs & things                                             | INFANT AIRWAY MANAGEMENT TRAINER                                 | 3 |  |
| 233 | Limbs & things                                             | CHEST TUBE MANIKIN                                               | 3 |  |
| 234 | Limbs & things                                             | CRICOTHYROTOMY SIMULATOR                                         | 3 |  |
| 235 | Limbs & things                                             | CRICOTRACHEOTOMY MODEL                                           | 3 |  |
| 236 | Limbs & things                                             | COMPLETE ADULT CRISIS MANIKIN                                    | 3 |  |
| 237 | Limbs & things                                             | DELUXE ADULT CRISIS MANIKIN, ECG SIMULATOR                       | 3 |  |
| 238 | Limbs & things                                             | ADULT CRISIS TORSO + ECG SIMULATOR                               | 3 |  |
| 239 | Limbs & things                                             | CHILD CRISIS MANIKIN                                             | 3 |  |

|     |                |                                                  |   |  |
|-----|----------------|--------------------------------------------------|---|--|
| 240 | Limbs & things | INFANT CRISIS MANIKIN                            | 3 |  |
| 241 | Limbs & things | STAT MANIKIN                                     | 3 |  |
| 242 | Limbs & things | STAT BABY                                        | 3 |  |
| 243 | Limbs & things | ADULT ALS FULL BODY TRAINER                      | 3 |  |
| 244 | Limbs & things | ADULT ALS TORSO TRAINER                          | 3 |  |
| 245 | Limbs & things | ALS TRAUMA HEAD                                  | 3 |  |
| 246 | Limbs & things | TRUMAN MULTI FOR AIRWAY MANAGEMENT AND BASIC CPR | 3 |  |
| 247 | Limbs & things | UNIVERSAL AED TRAINER                            | 3 |  |
| 248 | Limbs & things | DEFIBRILLATION CPR TRAINING MANIKIN              | 3 |  |
| 249 | Limbs & things | ADVANCED AIRWAY LARRY ADULT TRAINER HEAD         | 3 |  |
| 250 | Limbs & things | CRITICAL AIRWAY MANAGEMENT TRAINER               | 3 |  |
| 251 | Limbs & things | AIRSIM BRONCHI MODEL                             | 3 |  |
| 252 | Limbs & things | AIRSIM ADVANCE MODEL                             | 3 |  |
| 253 | Limbs & things | ADULT INTUBATION TRAINER                         | 3 |  |
| 254 | Limbs & things | ENDOTRACHEAL INTUBATION                          | 3 |  |
| 255 | Limbs & things | CHILD AIRWAY MANAGEMENT TRAINER                  | 3 |  |
| 256 | Limbs & things | BRONCHO JUNIOR                                   | 3 |  |
| 257 | Limbs & things | INFANT AIRWAY MANAGEMENT TRAINER                 | 3 |  |
| 258 | Limbs & things | INTUBATION PHANTOM OF NEW-BORN BABY              | 3 |  |
| 259 | Limbs & things | ADVANCED INFANT INTUBATION TRAINER               | 3 |  |
| 260 | Limbs & things | INTUBATION BABY MODEL                            | 3 |  |
| 261 | Limbs & things | RESUSCITATION MODEL OF NEW-BORN BABY             | 3 |  |
| 262 | Limbs & things | AIRSIM JUNIOR PAEDIATRIC AIRWAY MODEL            | 3 |  |
| 263 | Limbs & things | ADULT CHOKING MANIKIN                            | 3 |  |
| 264 | Limbs & things | ADOLESCENT CHOKING MANIKIN                       | 3 |  |
| 265 | Limbs & things | CHILD CHOKING MANIKIN                            | 3 |  |
| 266 | Limbs & things | BRAD/PAUL CPR TRAINING MANIKIN                   | 3 |  |
| 267 | Limbs & things | JAW THRUST BRAD                                  | 3 |  |
| 268 | Limbs & things | ADAM/DAVID CPR ADULT                             | 3 |  |
| 269 | Limbs & things | ADAM/DAVID CPR ADULT                             | 3 |  |

|     |                |                                                                             |   |  |
|-----|----------------|-----------------------------------------------------------------------------|---|--|
|     |                | WITH ELECTRONICS                                                            |   |  |
| 270 | Limbs & things | BLS TRAINER                                                                 | 3 |  |
| 271 | Limbs & things | OBESE CPR MANIKIN                                                           | 3 |  |
| 272 | Limbs & things | FULL BODIED<br>CPR/TRAUMA MANIKIN                                           | 3 |  |
| 273 | Limbs & things | CPARLENE BASIC TORSO                                                        | 3 |  |
| 274 | Limbs & things | CPARLENE TORSO<br>ELECTRONIC WITH LIGHT<br>CONTROLLER                       | 3 |  |
| 275 | Limbs & things | CPARLENE MANIKIN,<br>ELECTRONIC                                             | 3 |  |
| 276 | Limbs & things | CPARLENE™ MANIKIN<br>WITH ELECTRONIC<br>MONITOR, MEMORY AND<br>PRINTER UNIT | 3 |  |
| 277 | Limbs & things | BRAD JR 7 YEAR OLD<br>CHILD WITH CARRYING<br>BAG                            | 3 |  |
| 278 | Limbs & things | TIMMY 3 YEAR OLD CPR<br>MANIKIN                                             | 3 |  |
| 279 | Limbs & things | TIMMY 3 YEAR OLD CPR<br>MANIKIN, WHITE, WITH<br>ELECTRONIC CONSOLE<br>BOX   | 3 |  |
| 280 | Limbs & things | KYLE 3 YEAR OLD CHILD<br>CPR MANIKIN                                        | 3 |  |
| 281 | Limbs & things | BILLY 9 MONTH CPR<br>MANIKIN                                                | 3 |  |
| 282 | Limbs & things | BILLY 9 MONTH CPR<br>MANIKIN, WHITE, WITH<br>ELECTRONIC CONSOLE<br>BOX      | 3 |  |
| 283 | Limbs & things | KEVIN 6-9 MONTH OLD<br>INFANT CPR MANIKIN                                   | 3 |  |
| 284 | Limbs & things | CATHY/BONNIE<br>NEWBORN CPR MANIKIN                                         | 3 |  |
| 285 | Limbs & things | CATHY/BONNIE<br>NEWBORN CPR MANIKIN,<br>WITH ELECTRONIC<br>CONSOLE BOX      | 3 |  |
| 286 | Limbs & things | KIM NEW-BORN CPR<br>MANIKIN                                                 | 3 |  |
| 287 | Limbs & things | PREEMIE INFANT CPR<br>MANIKIN                                               | 3 |  |
| 288 | Limbs & things | BASIC BUDDY                                                                 | 3 |  |
| 289 | Limbs & things | BABY BUDDY                                                                  | 3 |  |
| 290 | Limbs & things | CPR PROMPT<br>ADULT/CHILD SINGLE<br>MANIKIN                                 | 3 |  |
| 291 | Limbs & things | CPR PROMPT INFANT<br>SINGLE MANIKIN                                         | 3 |  |
| 292 | Limbs & things | COMPLETE ADULT CRISIS                                                       | 3 |  |

|     |                     |                                                                                |   |                  |
|-----|---------------------|--------------------------------------------------------------------------------|---|------------------|
|     |                     | MANIKIN                                                                        |   |                  |
| 293 | Limbs & things      | DELUXE ADULT CRISIS MANIKIN + ECG SIMULATOR                                    | 3 |                  |
| 294 | Limbs & things      | DELUXE ADULT CRISIS MANIKIN, ECG SIMULATOR + MONITOR, MEMORY, PRINTER UNIT     | 3 |                  |
| 295 | Limbs & things      | ADULT CRISIS AUSCULTATION MANIKIN                                              | 3 |                  |
| 296 | Limbs & things      | DELUXE PLUS ADULT CRISIS AUSCULTATION MANIKIN                                  | 3 |                  |
| 297 | Limbs & things      | NG TUBE AND TRACHEOSTOMY SKILLS SIMULATOR                                      | 3 |                  |
| 298 | Limbs & things      | PATIENT EDUCATION TRACHEOSTOMY CARE SET                                        | 3 |                  |
| 299 | Limbs & things      | Tracheotomy Care Simulator                                                     | 3 |                  |
| 300 | 3B Scientific       | Patient Care and BLS Manikin                                                   | 3 |                  |
| 301 | 3B Scientific       | TRACHEOSTOMY CARE SIMULATOR                                                    | 3 |                  |
| 302 | 3B Scientific       | Code Blue® I - Multipurpose CPR and Patient Care Simulator intubatable airways | 3 |                  |
| 303 | 3B Scientific       | Life/form® NG Tube & Trach Skills Simulator                                    | 3 |                  |
| 304 | CAE                 | CAE Caesar™                                                                    | 3 |                  |
| 305 | trucorp             | airsim                                                                         | 3 |                  |
| 306 | trucorp             | truman                                                                         | 3 |                  |
| 307 | koken               | Thoracic trauma trainer                                                        | 3 |                  |
| 308 | koken               | Advanced life support simulator                                                | 3 |                  |
| 309 | koken               | Koken airway management model                                                  | 3 |                  |
| 310 | koken               | Koken Endotracheal intubation training model                                   | 3 |                  |
| 311 | koken               | Neonatal resuscitation Model                                                   | 3 |                  |
| 312 | koken               | Airway Management Trainer                                                      | 3 |                  |
| 313 | ambu                | Ambu® Cardiac Care Trainer System                                              | 3 |                  |
| 314 | Gaumard             | PEDI® Blue Neonatal Simulator with SmartSkin™ Technology                       | 3 | concurrent [152] |
| 315 | KYOTO KAGAKU CO.LTD | Suture Evaluation Simulator                                                    | 4 |                  |

|     |                                                                  |                                                                                          |   |                                     |
|-----|------------------------------------------------------------------|------------------------------------------------------------------------------------------|---|-------------------------------------|
| 316 | Simbionix                                                        | GI Mentor                                                                                | 4 | predictive<br>[68-78; 156]          |
| 317 | Simbionix                                                        | URO Mentor                                                                               | 4 | Predictive<br>[53; 57-60;<br>79-82] |
| 318 | Simbionix                                                        | PERC Mentor                                                                              | 4 | predictive<br>[83; 157]             |
| 319 | Simbionix                                                        | Lap Mentor                                                                               | 4 | Predictive<br>[54; 84-88]           |
| 320 | Simbionix                                                        | Angio Mentor                                                                             | 4 |                                     |
| 321 | Simbionix                                                        | VirtaMed<br>Hystsim/TURPSim                                                              | 4 |                                     |
| 322 | Simbionix                                                        | GI BRONCH Mentor                                                                         | 4 |                                     |
| 323 | Laerdal                                                          | Patient Kelly                                                                            | 4 |                                     |
| 324 | Laerdal                                                          | Convalescent Kelly                                                                       | 4 |                                     |
| 325 | Laerdal                                                          | NG Tube and Trach Care<br>Trainer                                                        | 4 |                                     |
| 326 | Laerdal                                                          | Baby Umbi                                                                                | 4 |                                     |
| 327 | Laerdal                                                          | Interchangeable<br>Catheterization and Enema<br>Task Trainer                             | 4 |                                     |
| 328 | Laerdal                                                          | In-Service Home Care<br>Training Simulator                                               | 4 |                                     |
| 329 | simulab                                                          | Hernia Model                                                                             | 4 |                                     |
| 330 | simulab                                                          | Pediatric Pyeloplasty<br>Model                                                           | 4 |                                     |
| 331 | simulab                                                          | Lipoma Pad                                                                               | 4 |                                     |
| 332 | simulab                                                          | Sebaceous Cyst Pad                                                                       | 4 |                                     |
| 333 | simulab                                                          | TraumaMan System                                                                         | 4 | Concurrent<br>[89;158]              |
| 334 | simulab                                                          | TraumaChild System                                                                       | 4 |                                     |
| 335 | simulab                                                          | Folding Suture Trainer                                                                   | 4 |                                     |
| 336 | simulab                                                          | LapTrainer with<br>SimuVision                                                            | 4 | Concurrent<br>[90; 91]              |
| 337 | simulab                                                          | Pop-Up Trainer                                                                           | 4 |                                     |
| 338 | simulab                                                          | Tower trainer                                                                            | 4 | concurrent<br>[92; 152]             |
| 339 | simulab                                                          | Subcuticular Suturing<br>Model                                                           | 4 |                                     |
| 340 | simulab                                                          | Tissue model                                                                             | 4 |                                     |
| 341 | simulab                                                          | Episiotomy Trainer                                                                       |   |                                     |
| 342 | Shanghai Honglian<br>Medical Instrument<br>Development Co., Ltd. | Transparent Female<br>Urethral Catheterization<br>Simulator(medical model)               | 4 |                                     |
| 343 | Shanghai Honglian<br>Medical Instrument<br>Development Co., Ltd. | Advanced Female Urethral<br>Catheterization<br>Simulator(nursing<br>model,medical model) | 4 |                                     |
| 344 | Shanghai Honglian<br>Medical Instrument<br>Development Co., Ltd. | Transparent Male Urethral<br>Catheterization<br>Simulator(medical model)                 | 4 |                                     |

|     |                                                            |                                                                            |   |                          |
|-----|------------------------------------------------------------|----------------------------------------------------------------------------|---|--------------------------|
| 345 | Shanghai Honglian Medical Instrument Development Co., Ltd. | Advanced Wearable Female Urethral Catheterization Simulator(medical model) | 4 |                          |
| 346 | Limbs & things                                             | Advanced Catheterization Trainer                                           | 4 |                          |
| 347 | Limbs & things                                             | BSS Trainer                                                                | 4 |                          |
| 348 | Limbs & things                                             | BSS Tendon Repair Trainer                                                  | 4 |                          |
| 349 | Limbs & things                                             | Knot Tying Trainer                                                         | 4 |                          |
| 350 | Limbs & things                                             | Wound Closure Pad                                                          | 4 |                          |
| 351 | Limbs & things                                             | Sebaceous Cyst Pad                                                         | 4 |                          |
| 352 | Limbs & things                                             | Lipoma Pad                                                                 | 4 |                          |
| 353 | Limbs & things                                             | Curettage, Snip & Shave Excision Pad                                       | 4 |                          |
| 354 | Limbs & things                                             | Colonoscopy Training Model                                                 | 4 |                          |
| 355 | Limbs & things                                             | Open Inguinal Hernia Repair Trainer                                        | 4 |                          |
| 356 | Limbs & things                                             | Surgical Female Pelvic Trainer for Laparoscopic Procedures                 | 4 |                          |
| 357 | Limbs & things                                             | Surgical Female Pelvic Trainer for Open Procedures                         | 4 |                          |
| 358 | Limbs & things                                             | Hysteroscopic Resection Trainer                                            | 4 |                          |
| 359 | Limbs & things                                             | Hysteroscopic Diagnostic Trainer                                           | 4 |                          |
| 360 | Limbs & things                                             | Episiotomy Trainer                                                         | 4 |                          |
| 361 | Limbs & things                                             | Sultan Anal Sphincter Trainer                                              | 4 |                          |
| 362 | Limbs & things                                             | Keele & Staffs Episiotomy Repair Trainer                                   | 4 |                          |
| 363 | Limbs & things                                             | Female Genital Mutilation Deinfibulation Trainer                           | 4 |                          |
| 364 | Limbs & things                                             | Uro-Scopic Trainer                                                         | 4 | content [53]             |
| 365 | Limbs & things                                             | Saphenous Vein Harvesting Trainer                                          | 4 |                          |
| 366 | Limbs & things                                             | Sapheno Femoral Junction Ligation Technique Trainer                        | 4 |                          |
| 367 | Limbs & things                                             | Arterial Procedures Kit                                                    | 4 |                          |
| 368 | Limbs & things                                             | Femoro-Peroneal Anastomosis Trainer                                        | 4 |                          |
| 369 | mentice                                                    | VIST™ System                                                               | 4 | Construct [142-149]      |
| 370 | mentice                                                    | VIST-C™                                                                    | 4 |                          |
| 371 | mentice                                                    | MIST™                                                                      | 4 | Predictive [93-107; 157] |
| 372 | mentice                                                    | Xitact™ IHP                                                                | 4 | Construct [63;           |

|     |              |                                                   |   |          |
|-----|--------------|---------------------------------------------------|---|----------|
|     |              |                                                   |   | 108-110] |
| 373 | mentice      | Xitact™ ITP - Instrument tracking port            | 4 |          |
| 374 | mentice      | INFANT INTRAOSSEOUS INFUSION SIMULATOR            | 4 |          |
| 375 | Adam Rouilly | SCOPIN II (BRONCHO BOY) TRAINER                   | 4 |          |
| 376 | Adam Rouilly | ARTHROSCOPY KNEE                                  | 4 |          |
| 377 | Adam Rouilly | ARTHROSCOPY MODEL OF THE SHOULDER                 | 4 |          |
| 378 | Adam Rouilly | BRONCHOSCOPY TRAINING MODEL                       | 4 |          |
| 379 | Adam Rouilly | URETHRAL CATHETERISATION MODEL                    | 4 |          |
| 380 | Adam Rouilly | ADVANCED FEMALE CATHETERISATION TRAINER           | 4 |          |
| 381 | Adam Rouilly | FEMALE CATHETERISATION SIMULATOR                  | 4 |          |
| 382 | Adam Rouilly | FEMALE CATHETERISATION AND RECTAL INJECTION MODEL | 4 |          |
| 383 | Adam Rouilly | INFANT MALE AND FEMALE CATHETERISATION MODEL      | 4 |          |
| 384 | Adam Rouilly | MALE CATHETERISATION MODEL                        | 4 |          |
| 385 | Adam Rouilly | ADVANCED MALE CATHETERISATION TRAINER             | 4 |          |
| 386 | Adam Rouilly | MALE CATHETERISATION SIMULATOR                    | 4 |          |
| 387 | Adam Rouilly | MALE/FEMALE CATHETERISATION TRAINER               | 4 |          |
| 388 | Adam Rouilly | CHEST DRAIN SIMULATOR                             | 4 |          |
| 389 | Adam Rouilly | OGI PHANTOM                                       | 4 |          |
| 390 | Adam Rouilly | UROLOGICAL EXAMINATION PHANTOM                    | 4 |          |
| 391 | Adam Rouilly | BLADDER PHANTOM                                   | 4 |          |
| 392 | Adam Rouilly | BLADDER PHANTOM FOR ENDOSCOPY                     | 4 |          |
| 393 | Adam Rouilly | EPISIOTOMY SUTURING SIMULATORS                    | 4 |          |
| 394 | Adam Rouilly | EPISIOTOMY TRAINER                                | 4 |          |
| 395 | Adam Rouilly | KEELE AND STAFFS EPISIOTOMY REPAIR TRAINER        | 4 |          |

|     |                  |                                            |   |                           |
|-----|------------------|--------------------------------------------|---|---------------------------|
| 396 | Adam Rouilly     | EPISIOTOMY SUTURING TRAINER                | 4 |                           |
| 397 | Adam Rouilly     | NASOGASTRIC FEEDING - THE HUNGRY MANIKIN   | 4 |                           |
| 398 | Adam Rouilly     | LapX Virtual Reality Laparoscopy Simulator | 4 |                           |
| 399 | Adam Rouilly     | PERITONEAL DIALYSIS SIMULATOR              | 4 |                           |
| 400 | Adam Rouilly     | RHINOPLASTY MODEL                          | 4 |                           |
| 401 | Adam Rouilly     | SUTURE PRACTICE LEG                        | 4 |                           |
| 402 | Adam Rouilly     | SUTURE PRACTICE ARM                        | 4 |                           |
| 403 | Adam Rouilly     | WOUND CLOSURE PAD                          | 4 |                           |
| 404 | Adam Rouilly     | PROFESSIONAL SKIN PAD MK2                  | 4 |                           |
| 405 | Adam Rouilly     | CURETTAGE, SNIP AND SHAVE EXCISION PAD     | 4 |                           |
| 406 | Adam Rouilly     | LOCAL ANAESTHESIA MINOR SURGERY            | 4 |                           |
| 407 | Adam Rouilly     | SUCTION TRAINING MODEL TYPE II             | 4 |                           |
| 408 | Adam Rouilly     | SUPRAPUBIC TRAINING MODEL                  | 4 |                           |
| 409 | virtamed         | HystSim                                    | 4 | Construct [111; 112]      |
| 410 | virtamed         | Turpsim                                    | 4 |                           |
| 411 | immersion        | LapSim                                     | 4 |                           |
| 412 | simsurgery       | SEP                                        | 4 | Predictive [76; 113-116]  |
| 413 | gaumard          | ZOE® Gynecologic Simulator                 | 4 | Concurrent [152]          |
| 414 | gmv              | insightarthrovr                            | 4 | concurrent [15; 36; 117]  |
| 415 | real sim systems | LTS                                        | 4 | Content [118-120]         |
| 416 | real sim systems | LTB                                        | 4 |                           |
| 417 | mimics           | dv- trainer                                | 4 | Construct [55; 121-123]   |
| 418 | 3-Dmed           | Single site training system                | 4 |                           |
| 419 | CAE              | CAE LaparoscopyVR                          | 4 | Construct [124; 125]      |
| 420 | CAE              | CAE EndoscopyVR                            | 4 | Predictive [126-128]      |
| 421 | CAE              | CathLabVR simulator                        | 4 |                           |
| 422 | CAE              | CAE ProMIS simulator                       | 4 | concurrent [103; 129-138] |
| 423 | simuluids        | Male & Female Catheterization Trainers     | 4 |                           |
| 424 | surgical science | Lap sim                                    | 4 |                           |
| 425 | simendo          | Simendo arthroscopy                        | 4 |                           |
| 426 | simendo          | Simendo laparoscopy                        | 4 | predictive                |



|     |               |                                                   |   |              |
|-----|---------------|---------------------------------------------------|---|--------------|
|     |               |                                                   |   | [36; 44;141] |
| 427 | 3B Scientific | Sigmoidoscopic Examination Simulator              | 4 |              |
| 428 | koken         | Male catheter model                               | 4 |              |
| 429 | koken         | Urethral catheterization model                    | 4 |              |
| 430 | koken         | Female catheterization and rectal injection Model | 4 |              |
| 431 | koken         | Bronchoscopy training model                       | 4 |              |
| 432 | koken         | Endoscopic submucosal dissection training model   | 4 |              |
| 433 | koken         | openskin:skin for surgical training               | 4 |              |
